# Supplementary material for: Luminomagnetic bifunctionality of Mn2+-bonded graphene oxide/reduced graphene oxide two dimensional nanosheets
Source: Royal Society of Chemistry journal article supplement (doi:10.1039/c5nr01095k), 2015-01-01
Supplement: c5nr01095k1.pdf [file c5nr01095k1.pdf]

## **†Electronic Supplementary Information (ESI)**

### **Luminomagnetic bifunctionality of Mn<sup>2+</sup>-bonded graphene oxide /reduced graphene oxide two dimensional nanosheets**

Amandeep,<sup>‡a</sup> Garima Kedawat,<sup>‡b</sup> Pawan Kumar,<sup>a,c</sup> Avaneesh Anshul,<sup>a,d</sup> Abhay D. Deshmukh,<sup>a,e</sup>  
Om Pal Singh,<sup>a,c</sup> R. K. Gupta,<sup>f</sup> S. S. Amritphale,<sup>d</sup> Govind Gupta,<sup>a</sup> V. N. Singh<sup>a</sup> and Bipin Kumar  
Gupta<sup>\*a</sup>

<sup>a</sup>CSIR-National Physical Laboratory, Dr K S Krishnan Road, New Delhi, 110012, India.

<sup>b</sup>Department of Physics, Kalindi College, University of Delhi, New Delhi, 110008, India

<sup>c</sup>Academy of Scientific and Innovative Research (AcSIR), CSIR–National Physical Laboratory campus,  
New Delhi–110012, India

<sup>d</sup>CSIR-Advanced Materials and Processes Research Institute, Bhopal, 462024, India

<sup>e</sup>Energy Material and Devices Laboratory, Department of Physics, RTM Nagpur University, Nagpur,  
440033, India

<sup>f</sup>Department of Chemistry, Pittsburg State University, Pittsburg, KS, 66762, USA

*\* Corresponding author. Tel.: +91-11-45609385, Fx: +91-11-45609310*

*E-mail address: [bipinbhu@yahoo.com](mailto:bipinbhu@yahoo.com)*

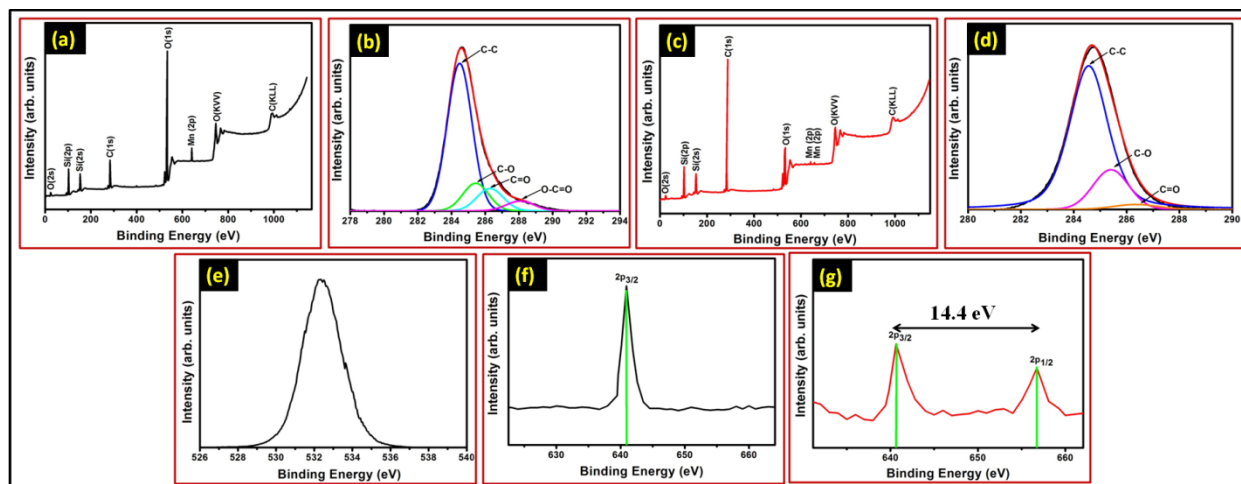

**Figure S1:** (a) XPS spectrum of MnGO10 composite, (b) high resolution spectra of C1s region for MnGO10 composite, (c) XPS spectrum of MnRGO10 composite, (d) high resolution spectra of C1s region for MnRGO10 composite, (e) core level peak of O1s for MnGO10 composite, (f) high resolution core level peak of Mn2p for MnGO10 composite and (g) high resolution core level peak of Mn2p for MnRGO10 composite.

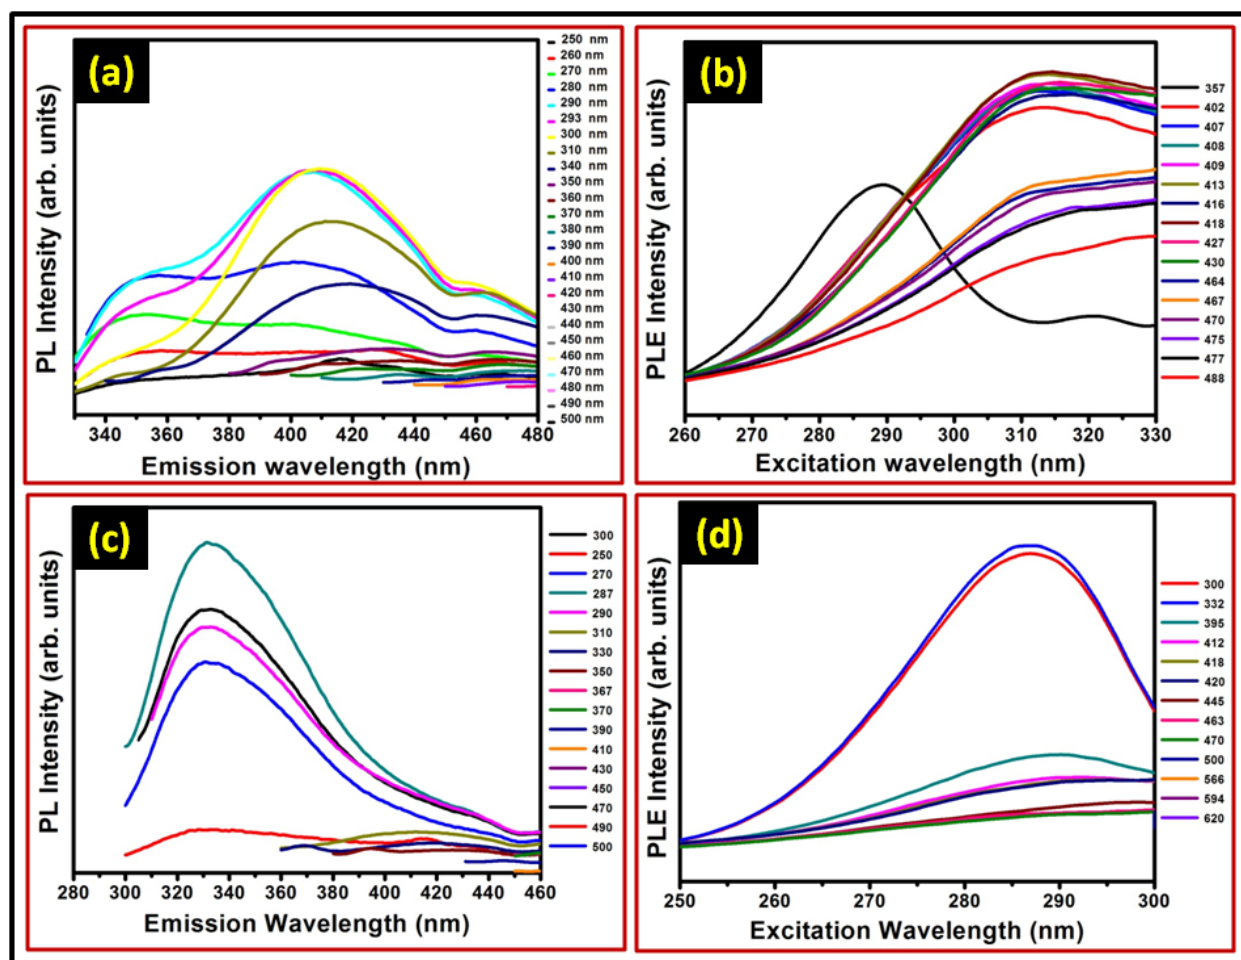

**Figure S2:** PL emission spectra for MnGO10 composite, (b) PLE spectra for MnGO10 composite at different monitoring and excitation wavelengths, respectively, (c) PL emission spectra for MnRGO10 composite and (d) PLE spectra for MnRGO10 composite at different monitoring and excitation wavelengths, respectively.

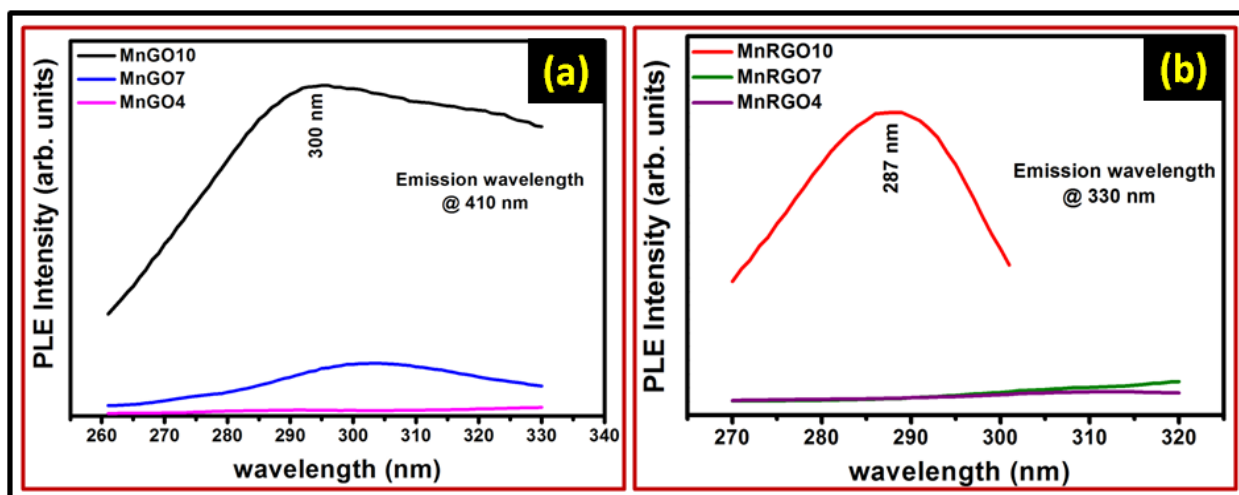

**Figure S3:** PLE spectra for (a) MnGO and (b) MnRGO composite at different pH values (4, 7 and 10).
